# Supplementary material for: Collecting Evidence to Inform Salt Reduction Policies in Argentina: Identifying Sources of Sodium Intake in Adults from a Population-Based Sample
Source: Nutrients. 2017 Aug 31;9(9):964. doi: 10.3390/nu9090964 (PMC5622724; doi:10.3390/nu9090964)
Supplement: Supplementary file 1 [file nutrients-09-00964-s001.pdf]

## Supplementary Tables and Figures

**Table S1.** Food items included in the short questionnaire, household measuring units to estimate quantities per time, **sodium content per 100 g of food and maximum values set by National Act 26905.**

| Food product                                                           | Units                                                 | Sodium<br>(mg/100 g) | Max. values:<br>Sodium<br>mg/100 g |
|------------------------------------------------------------------------|-------------------------------------------------------|----------------------|------------------------------------|
| <b>Cheeses</b>                                                         |                                                       |                      |                                    |
| Soft and semi-soft cheeses such as Brie or Port Salut                  | [slices, 1 slice=60g]                                 | 443                  | -                                  |
| Medium-hard cheeses such as Gouda, Mar del Plata, Edam                 | [slices, 1 slice=60g]                                 | 624                  | -                                  |
| Hard cheeses or “grating cheeses” such as Parmesan or Reggiano         | SP (10 g)*                                            | 804                  | -                                  |
| Cheese without added salt                                              | SP (60 g)*                                            | 55.3                 | -                                  |
| <b>Meats</b>                                                           |                                                       |                      |                                    |
| Vienna sausage                                                         | [units, 1 unit=40 g]                                  | 978                  | 1196                               |
| Chorizo or chorizo-sausage, fresh sausage                              | [units, 1 unit=90 g]                                  | 1041                 | 950                                |
| Other cold cuts as ham salami bologna and other sliced cold cuts       | [slices, 1 slice=20 g]                                | 833                  | 1196                               |
| Pre-processed hamburgers                                               | [units, 1 unit=90 g]                                  | 720                  | 850                                |
| Frozen pre-cooked breaded chicken nuggets or fish                      | [medallions,<br>1 medallion=82 g]                     | 515                  | 736                                |
| Canned fish                                                            | SP (60 g)*                                            | 346                  | -                                  |
| <b>Dough</b>                                                           |                                                       |                      |                                    |
| “Empanadas” (individual pies) , puff pastry                            | [units, 1 unit=30 g]                                  | 619                  | -                                  |
| Quiches/pies (any filling), puff pastry                                | [servings, 1 serving=50 g]                            | 625                  | -                                  |
| Pizza                                                                  | [servings, 1 serving=60 g]                            | 505                  | -                                  |
| <b>Breads, Crackers and Cookies</b>                                    |                                                       |                      |                                    |
| French bread or whole-wheat bread                                      | [“mignones”(bread rolls), 1<br>mignon=40 g]           | 800                  | -                                  |
| Sliced or sandwich bread, white or whole-wheat                         | [slices, 1 slice=25 g]                                | 494                  | 530/501                            |
| Hamburger or hot dog buns                                              | [units, 1 unit=50 g]                                  | 474                  | 530                                |
| Bread without added salt                                               | [“mignones”(bread rolls), 1<br>mignon=40 g]           | 10                   | -                                  |
| White or whole wheat crackers                                          | [units, 1 unit=6 g]                                   | 629                  | 941                                |
| Crackers without added salt made with white or whole flour             | [units, 1 unit=6 g]                                   | -                    | -                                  |
| Cookies                                                                | [units, 1 unit=7 g]                                   | 283                  | 512                                |
| Filled/Sandwich cookies such as Oreo®                                  | [units, 1 unit=13 g]                                  | 251                  | 429                                |
| Danish/croissants and other baked/fried sweet dough as churros         | [units, 1 unit=35 g]                                  | 55                   | -                                  |
| Biscuits or savory bizcochos                                           | [units, 1 unit=11 g]                                  | 747                  | 530                                |
| Cakes, pies, muffins, cupcakes                                         | [servings or slices, 1<br>serving=40 g]               | 280                  | -                                  |
| Alfajor                                                                | [units, 1 unit=50 g]                                  | 100                  | -                                  |
| <b>Other products</b>                                                  |                                                       |                      |                                    |
| Margarines                                                             | [teaspoons, 1 teaspoon=5 g]                           | 435                  | -                                  |
| Butter, salted                                                         | [indiv. pack/teaspoons, 1<br>teaspoon=5 g]            | 160                  | -                                  |
| Salted snacks (such as salted sticks, cheese puffs, chips)             | [cups, 1 cup=25 g]                                    | 768                  | 950                                |
| Salted peanuts                                                         | [cups, 1 cup=100 g]                                   | 1451                 | 950                                |
| Sauces, ready-to-use (such as Italian or Spaghetti sauce)              | SP (50 g)*                                            | 389                  | -                                  |
| Canned vegetables and/or legumes (such as corn, garden salad, lentils) | SP (100 g)*                                           | 212                  | -                                  |
| Bouillon cubes or powder                                               | SP (quantity to prepare one<br>serving of 200 ml)*    | 352                  | 430                                |
| Instant soups                                                          | [individual pouches, cups or<br>bowls, 1 cup =235 ml] | 239                  | 352                                |
| Mayonnaise, mustard, ketchup, etc                                      | SP (12 g)*                                            | 916                  | -                                  |

\*Quantities of these items were based on standardized portions (SP)

**Table S2.** Sodium content in food products/100g of food: Source of data

| Food products                                                                                                                                                                                                                                                                                                                                                                                                                                                             | Source                                              | Observations                                                                                                                                                                                  |
|---------------------------------------------------------------------------------------------------------------------------------------------------------------------------------------------------------------------------------------------------------------------------------------------------------------------------------------------------------------------------------------------------------------------------------------------------------------------------|-----------------------------------------------------|-----------------------------------------------------------------------------------------------------------------------------------------------------------------------------------------------|
| French bread or whole-wheat bread , [bread rolls]                                                                                                                                                                                                                                                                                                                                                                                                                         | Ferrante et al 2011[2]                              | Direct Analysis<br>French bread.<br>Representative sample of bakeries from Argentina affiliated with the Argentinean Federation of Bakeries.                                                  |
| Cheeses, Meat Products (Vienna sausage, Chorizo or chorizo-sausage sausage, Other cold cuts as ham, salami, bologna and other sliced cold cuts, Pre-processed hamburgers, Frozen pre-cooked breaded chicken, nuggets). Canned fish. Canned vegetables. Bouillon cubes or powder, Instant soups. Empanadas/pies/quiches (puff pastry), Pizza Margarines, Butter (salted). Salted snacks, Salted peanuts. Sauces (ready-to-use). Alfajores. Cakes, pies, muffins, cupcakes. | Allemandi et al 2013[3];<br>Allemandi et al 2015[1] | Indirect Data (Labeling or food industry web site)<br>Sample based on market share (main brands were included) in one supermarket.                                                            |
| Sliced or sandwich bread, white or whole-wheat, Hamburger or hot dog buns, Bread without added salt, White or whole wheat crackers, Cookies, Filled/Sandwich cookies such as Oreo®, Crackers without added salt, made with white or whole flour, Biscuits or savory bizcochos                                                                                                                                                                                             | Elorriaga et al 2013[4]                             | Indirect Data (Labeling)<br>Packaged breads, crackers, cookies.<br>Any brand products available in 6 stores in Bariloche and Marcos Paz (2 supermarkets, two markets and two grocery stores). |
| Danish/croissants and other baked/fried sweet dough as churros                                                                                                                                                                                                                                                                                                                                                                                                            | SARA Software[5]                                    | Direct Analysis. (INFOODS Methodology)<br>Food codes A14, A15, A16                                                                                                                            |

**Table S3.** Weighted linear regression models of sodium intake from food products.

|                      | <b>Sodium intake from food products(md/day)<sup>1,2</sup></b> |                |
|----------------------|---------------------------------------------------------------|----------------|
|                      | <b>Coefficient (95%CI)</b>                                    | <b>P value</b> |
| Male                 | 439.1 (304.8; 573.5)                                          | <0.001         |
| Age (≥55y)           | -94.9 (-223.8; 334.0)                                         | 0.149          |
| Education Level, >8y | -191.7 (-327.5; -55.8)                                        | 0.006          |

95% CI: 95% confidence interval.

<sup>1</sup>Values are expressed in mg of sodium per day; to calculate grams of salt, multiply mg of sodium by 0.0025

<sup>2</sup> Models included age, sex, level of education

**Table S4.** Reported weighted frequency of consumption of separated food items included in the short questionnaire during the last 12 months

| Food items                                                             | Every day,<br>once or more<br>times (%) | 2-6 times a<br>week (%) | Once a<br>week (%) | Less than<br>once a<br>week (%) | Never or less<br>than once a<br>month (%) |
|------------------------------------------------------------------------|-----------------------------------------|-------------------------|--------------------|---------------------------------|-------------------------------------------|
| <b>Soups, dressings, canned foods and other convenience foods</b>      |                                         |                         |                    |                                 |                                           |
| Bouillon cubes or powder                                               | 8.9                                     | 21                      | 16.3               | 19.9                            | 33.9                                      |
| Instant soups                                                          | 9.1                                     | 7.0                     | 9.6                | 20.9                            | 53.4                                      |
| Empanadas (meat pies)                                                  | 0.1                                     | 13.9                    | 32.4               | 46.2                            | 7.4                                       |
| Quiches (any filling such as vegetables, ham and cheese, poultry, etc) | 1                                       | 20.0                    | 24.7               | 36.8                            | 17.5                                      |
| Pizza                                                                  | 0.1                                     | 9.1                     | 38.2               | 45.7                            | 6.9                                       |
| Canned vegetables/legumes                                              | 0.5                                     | 20.8                    | 20.7               | 19.4                            | 38.6                                      |
| Canned Fish                                                            | 0.0                                     | 7.9                     | 22.7               | 39.9                            | 29.5                                      |
| Sauces, ready-to-use                                                   | 0.2                                     | 18.5                    | 18.7               | 15.5                            | 47.1                                      |
| Mayonnaise, mustard, ketchup, etc.                                     | 1.0                                     | 12.9                    | 19.4               | 28.4                            | 38.3                                      |
| <b>Bread, crackers, cookies</b>                                        |                                         |                         |                    |                                 |                                           |
| French bread or whole wheat bread (from bakeries)                      | 26.4                                    | 28.5                    | 17.2               | 8.8                             | 19.1                                      |
| Sliced or sandwich bread                                               | 2.2                                     | 7.5                     | 6.8                | 13.5                            | 70                                        |
| Bread, Vienna                                                          | 0.3                                     | 2.4                     | 5.7                | 9.6                             | 82                                        |
| Bread, any type without added salt                                     | 5.5                                     | 4.1                     | 3.9                | 6.3                             | 80.2                                      |
| White or whole wheat crackers                                          | 21.3                                    | 11.8                    | 8.1                | 14.6                            | 44.2                                      |
| White or whole wheat crackers, without added salt                      | 16.6                                    | 7.3                     | 5.4                | 12.2                            | 58.5                                      |
| Cookies                                                                | 6                                       | 13.7                    | 11.3               | 26.3                            | 42.7                                      |
| Filled/sandwich cookies such as Oreo                                   | 4.6                                     | 12.8                    | 10.5               | 24.9                            | 47.2                                      |
| <b>Meats Products</b>                                                  |                                         |                         |                    |                                 |                                           |
| Vienna sausage                                                         | 0.0                                     | 6.3                     | 13.7               | 30.8                            | 49.2                                      |
| Chorizo/Chorizo sausage /Argentinean sausage                           | 0.1                                     | 1.7                     | 19.8               | 48.2                            | 30.2                                      |
| Other cold cuts (such as ham, salami, bologna, etc.)                   | 0.9                                     | 22                      | 19.7               | 38.3                            | 19.1                                      |
| Pre-processed hamburgers                                               | 0.0                                     | 8.2                     | 13.4               | 25.4                            | 53                                        |
| Frozen pre-cooked breaded chicken, nuggets or fish                     | 0.2                                     | 11.7                    | 12.8               | 12.8                            | 62.5                                      |
| <b>Cheeses</b>                                                         |                                         |                         |                    |                                 |                                           |

|                                                                      |      |      |      |      |      |
|----------------------------------------------------------------------|------|------|------|------|------|
| Soft cheeses (not including pizza, pies and cakes)                   | 4.8  | 29.9 | 23.8 | 29.2 | 12.3 |
| Semi-hard cheeses                                                    | 1.7  | 23.8 | 22   | 32.3 | 20.2 |
| Hard cheese (grated cheese type), alone or as part of another dish * | 1.6  | 30.2 | 23.9 | 30.1 | 14.2 |
| Without added salt                                                   | 16.1 | 6.5  | 5.4  | 13.7 | 58.3 |
| <b>Pastry, other bakery products, sweets</b>                         |      |      |      |      |      |
| Danish/croissants and other “Argentine facturas”                     | 1.7  | 12.2 | 22.4 | 37.9 | 25.8 |
| Biscuits or savory bizcochos                                         | 3.7  | 11.1 | 9.1  | 19.4 | 56.7 |
| Cakes, pies, muffins, etc                                            | 0.3  | 1.7  | 9    | 41.1 | 47.9 |
| Alfajores                                                            | 1.4  | 3.5  | 5.9  | 15.2 | 74   |
| <b>Other</b>                                                         |      |      |      |      |      |
| Margarine                                                            | 1.0  | 2.2  | 3.8  | 6    | 87   |
| Butter                                                               | 4.9  | 20.8 | 18.3 | 10.5 | 45.5 |
| Salted snacks                                                        | 0.0  | 1    | 7.2  | 24.8 | 67.0 |
| Salted peanuts                                                       | 0.0  | 0.7  | 6    | 24.2 | 69.1 |

**Table S5.1** Main dietary sources of sodium among women by age group

| Food products                         | Age                        |             |          |                            |             |          |
|---------------------------------------|----------------------------|-------------|----------|----------------------------|-------------|----------|
|                                       | < 55 y (n=724)             |             |          | ≥55 years (n=586)          |             |          |
|                                       | Sodium consumed per person |             |          | Sodium consumed per person |             |          |
|                                       | mg/day                     | %           | Ranking  | mg/day                     | %           | Ranking  |
|                                       | Mean (SE)                  |             |          | Mean (SE)                  |             |          |
| Sodium from food products             | 1675 (50)                  |             | 0        | 1604 (52)                  |             |          |
| Bouillon cubes, powder/ Instant soups | <b>322 (16)</b>            | <b>19.2</b> | <b>1</b> | <b>363 (19)</b>            | <b>22.6</b> | <b>1</b> |
| Meat products                         | 310 (14)                   | 18.5        | 2        | 249 (12)                   | 15.6        | 2        |
| Traditional Bread (from bakery)       | 268 (15)                   | 16          | 3        | 236 (18)                   | 14.7        | 4        |
| Cheeses                               | 252 (11)                   | 15.1        | 4        | 247 (12)                   | 15.4        | 3        |
| Empanada/Pie, puff pastry             | 148 (6)                    | 8.8         | 5        | 153 (7)                    | 9.5         | 5        |
| Pizza                                 | 74 (3)                     | 4.4         | 6        | 69 (3)                     | 4.3         | 6        |
| Crackers                              | 57 (4)                     | 3.4         | 7        | 57 (4)                     | 3.5         | 7        |
| Canned foods, (vegetables/fish)       | 49 (2)                     | 2.9         | 8        | 56 (4)                     | 3.5         | 8        |
| Peanuts, salty                        | 33 (2)                     | 2           | 9        | 26 (3)                     | 1.6         | 10       |
| Sliced or sandwich bread              | 27 (3)                     | 1.6         | 10       | 29 (3)                     | 1.8         | 9        |
| Cookies                               | 26 (2)                     | 1.5         | 11       | 18 (1)                     | 1.1         | 12       |
| Sauces, ready- to-use                 | 24 (1)                     | 1.4         | 12       | 22 (1)                     | 1.4         | 11       |
| Biscuits or savory bizcochos          | 18 (1)                     | 1.1         | 13       | 16 (1)                     | 1           | 13       |
| Pastry and other                      | 16 (1)                     | 0.9         | 14       | 13 (1)                     | 0.8         | 14       |
| Seasonings                            | 12 (1)                     | 0.7         | 15       | 8 (1)                      | 0.5         | 16       |
| Bread, (Vienna, Hamb./ hot dog bun)   | 12 (1)                     | 0.7         | 16       | 13 (2)                     | 0.8         | 15       |

SE: Standard Error

**Table S5.2** Main dietary sources of sodium among men by age group

| Food products                         | Age                                                     |             |          |                                                         |             |          |
|---------------------------------------|---------------------------------------------------------|-------------|----------|---------------------------------------------------------|-------------|----------|
|                                       | < 55 y (n=406)                                          |             |          | ≥55 years (n=413)                                       |             |          |
|                                       | Sodium<br>consumed<br>per person<br>mg/day<br>Mean (SE) | %           | Ranking  | Sodium<br>consumed<br>per person<br>mg/day<br>Mean (SE) | %           | Ranking  |
| Sodium from food products             | 2104 (76)                                               |             | 0        | 2085 (77)                                               |             |          |
| Meat products                         | <b>427 (22)</b>                                         | <b>20.3</b> | <b>1</b> | 378 (20)                                                | 18.1        | 2        |
| Traditional Bread (from bakery)       | 425 (27)                                                | 20.2        | 2        | <b>423 (29)</b>                                         | <b>20.3</b> | <b>1</b> |
| Cheeses                               | 318 (18)                                                | 15.1        | 3        | 301 (17)                                                | 14.5        | 4        |
| Bouillon cubes, powder/ Instant soups | 290 (21)                                                | 13.8        | 4        | 367 (22)                                                | 17.6        | 3        |
| Empanada/Pie, puff pastry             | 197 (10)                                                | 9.3         | 5        | 194 (10)                                                | 9.3         | 5        |
| Pizza                                 | 105 (5)                                                 | 5           | 6        | 94 (5)                                                  | 4.5         | 6        |
| Crackers                              | 55 (5)                                                  | 2.6         | 7        | 60 (5)                                                  | 2.9         | 7        |
| Canned foods, (vegetables/fish)       | 51 (3)                                                  | 2.4         | 8        | 56 (3)                                                  | 2.7         | 8        |
| Peanuts, salty                        | 47 (4)                                                  | 2.2         | 9        | 35 (3)                                                  | 1.7         | 9        |
| Cookies                               | 35 (3)                                                  | 1.6         | 10       | 27 (3)                                                  | 1.3         | 11       |
| Sliced or sandwich bread              | 29 (4)                                                  | 1.4         | 11       | 32 (4)                                                  | 1.6         | 10       |
| Biscuits or savory bizcochos          | 26 (2)                                                  | 1.3         | 12       | 20 (2)                                                  | 1           | 13       |
| Sauces, ready- to-use                 | 24 (2)                                                  | 1.1         | 13       | 26 (2)                                                  | 1.2         | 12       |
| Pastry and other                      | 18 (1)                                                  | 0.9         | 14       | 16 (1)                                                  | 0.8         | 14       |
| Seasonings                            | 17 (1)                                                  | 0.8         | 15       | 12 (1)                                                  | 0.6         | 16       |
| Bread, (Vienna, Hamb./ hot dog bun)   | 15 (2)                                                  | 0.7         | 16       | 16 (3)                                                  | 0.8         | 15       |

SE: Standard Error



**Table S5.3** Main dietary sources of sodium among women by level of education

| Food products                              | Education                         |             |          |                                   |             |          |                                   |             |          |
|--------------------------------------------|-----------------------------------|-------------|----------|-----------------------------------|-------------|----------|-----------------------------------|-------------|----------|
|                                            | < 8years (n=684)                  |             |          | 8-12 years (n 434)                |             |          | >12 years (n 192)                 |             |          |
|                                            | Sodium consumed                   |             |          | Sodium consumed                   |             |          | Sodium consumed                   |             |          |
|                                            | per person<br>mg/day<br>Mean (SE) | %           | Ranking  | per person<br>mg/day<br>Mean (SE) | %           | Ranking  | per person<br>mg/day<br>Mean (SE) | %           | Ranking  |
| Sodium from food products                  | 1792 (57)                         |             | -        | 1578 (64)                         |             | -        | 1492 (77)                         |             | -        |
| Bouillon cubes, powder/ Instant soups      | <b>397 (22)</b>                   | <b>22.2</b> | <b>1</b> | 285 (18)                          | 18.1        | 2        | 296 (29)                          | 19.8        | 2        |
| Meat products                              | 311 (13)                          | 17.3        | 2        | <b>304 (19)</b>                   | <b>19.3</b> | <b>1</b> | 220 (21)                          | 14.8        | 3        |
| Traditional Bread (from bakery)            | 296 (21)                          | 16.5        | 3        | 243 (18)                          | 15.4        | 4        | 203 (22)                          | 13.6        | 4        |
| Chesses                                    | 235 (11)                          | 13.1        | 4        | 245 (15)                          | 15.5        | 3        | <b>299 (25)</b>                   | <b>20.0</b> | <b>1</b> |
| Empanada/Pie, puff pastry                  | 161 (7)                           | 9           | 5        | 146 (8)                           | 9.3         | 5        | 132 (12)                          | 8.9         | 5        |
| Pizza                                      | 74 (3)                            | 4.1         | 6        | 74 (4)                            | 4.7         | 6        | 68 (4)                            | 4.5         | 6        |
| Crackers                                   | 61 (5)                            | 3.4         | 7        | 54 (5)                            | 3.4         | 7        | 54 (7)                            | 3.6         | 7        |
| Canned foods, (vegetables/fish)            | 56 (2)                            | 3.1         | 8        | 47 (2)                            | 3           | 8        | 50 (7)                            | 3.3         | 8        |
| Peanuts, salty                             | 31 (3)                            | 1.7         | 9        | 34 (3)                            | 2.1         | 9        | 25 (4)                            | 1.7         | 10       |
| Sliced or sandwich bread                   | 29 (3)                            | 1.6         | 10       | 22 (3)                            | 1.4         | 11       | 35 (8)                            | 2.4         | 9        |
| Cookies                                    | 27 (2)                            | 1.5         | 11       | 21 (2)                            | 1.3         | 12       | 19 (4)                            | 1.3         | 11       |
| Sauces, ready- to-use                      | 26 (2)                            | 1.5         | 12       | 23 (2)                            | 1.5         | 10       | 17 (2)                            | 1.1         | 12       |
| Biscuits or savory bizcochos               | 20 (2)                            | 1.1         | 13       | 15 (1)                            | 1.0         | 14       | 15 (3)                            | 1.0         | 14       |
| Bread, (Vienna, Hamburguer or hot dog bun) | 15 (2)                            | 0.8         | 14       | 12 (2)                            | 0.8         | 15       | 8 (2)                             | 0.5         | 16       |
| Pastry and other                           | 14 (1)                            | 0.8         | 15       | 16 (1)                            | 1.0         | 13       | 13 (1)                            | 0.9         | 15       |
| Seasonings                                 | 9 (1)                             | 0.8         | 16       | 11 (1)                            | 0.6         | 16       | 15 (2)                            | 0.7         | 13       |

SE: Standard Error

**Table S5.4** Main dietary sources of sodium among men by level of education

| Food products                         | Education                         |             |          |                                   |           |          |                                   |             |          |
|---------------------------------------|-----------------------------------|-------------|----------|-----------------------------------|-----------|----------|-----------------------------------|-------------|----------|
|                                       | < 8years ( <i>n</i> 465)          |             |          | 8-12 years ( <i>n</i> 243)        |           |          | >12 years ( <i>n</i> 111)         |             |          |
|                                       | Sodium consumed                   |             |          | Sodium consumed                   |           |          | Sodium consumed                   |             |          |
|                                       | per person<br>mg/day<br>Mean (SE) | %           | Ranking  | per person<br>mg/day<br>Mean (SE) | %         | Ranking  | per person<br>mg/day<br>Mean (SE) | %           | Ranking  |
| Sodium from food products             | 2147 (79)                         |             | -        | 2138 (107)                        |           |          | 1912 (123)                        |             |          |
| Traditional Bread (from bakery)       | <b>426 (26)</b>                   | <b>19.9</b> | <b>1</b> | <b>450 (39)</b>                   | <b>21</b> | <b>1</b> | <b>375 (51)</b>                   | <b>19.6</b> | <b>1</b> |
| Meat products                         | 414 (21)                          | 19.3        | 2        | 439 (32)                          | 20.6      | 2        | 357 (37)                          | 18.7        | 2        |
| Bouillon cubes, powder/ Instant soups | 385 (27)                          | 17.9        | 3        | 260 (22)                          | 12.2      | 4        | 247 (28)                          | 12.9        | 4        |
| Cheeses                               | 282 (15)                          | 13.1        | 4        | 346 (28)                          | 16.2      | 3        | 326 (30)                          | 17.1        | 3        |
| Empanada/Pie, puff pastry             | 201 (11)                          | 9.3         | 5        | 196 (13)                          | 9.1       | 5        | 184 (17)                          | 9.6         | 5        |
| Pizza                                 | 97 (5)                            | 4.5         | 6        | 104 (8)                           | 4.9       | 6        | 109 (9)                           | 5.7         | 6        |
| Canned foods, (vegetables/fish)       | 59 (3)                            | 2.7         | 7        | 48 (3)                            | 2.2       | 8        | 48 (5)                            | 2.5         | 8        |
| Crackers                              | 57 (5)                            | 2.6         | 8        | 56 (7)                            | 2.6       | 7        | 58 (10)                           | 3           | 7        |
| Peanuts, salty                        | 42 (3)                            | 1.9         | 9        | 44 (5)                            | 2.1       | 9        | 43 (7)                            | 2.3         | 9        |
| Cookies                               | 32 (3)                            | 1.5         | 10       | 33 (4)                            | 1.5       | 10       | 32 (6)                            | 1.7         | 10       |
| Sliced or sandwich bread              | 29 (4)                            | 1.4         | 11       | 31 (5)                            | 1.5       | 11       | 30 (8)                            | 1.6         | 11       |
| Sauces, ready- to-use                 | 27 (2)                            | 1.3         | 12       | 24 (2)                            | 1.1       | 13       | 18 (3)                            | 1           | 13       |
| Biscuits or savory bizcochos          | 25 (2)                            | 1.2         | 13       | 28 (4)                            | 1.3       | 12       | 17 (3)                            | 0.9         | 14       |
| Bread, (Vienna, Hamb./hot dog bun)    | 17 (3)                            | 0.8         | 14       | 15 (3)                            | 0.7       | 16       | 9 (2)                             | 0.5         | 16       |
| Pastry and other                      | 15 (1)                            | 0.7         | 15       | 21 (2)                            | 1         | 14       | 16 (2)                            | 0.8         | 15       |
| Seasonings                            | 12 (1)                            | 0.5         | 16       | 18 (2)                            | 0.8       | 15       | 22 (3)                            | 1.1         | 12       |

SE: Standard Error

**Figure S1.** Sources of sodium from food products considering the inclusion in the National Act 26905, by sex and level of education

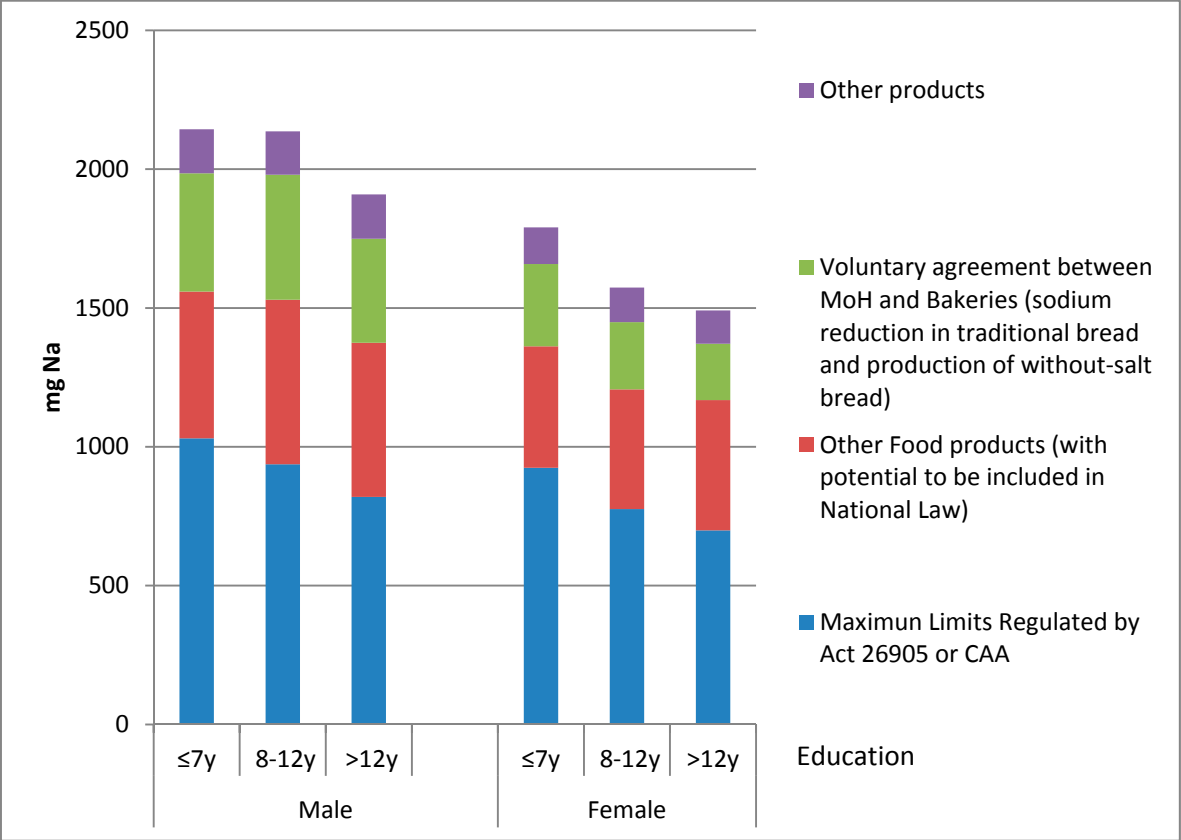

**Table S6.** Multiple-adjusted odds ratios of adding salt associated with demographic characteristics in adults aged 35-74y, Bariloche and Marcos Paz, Argentina, n=3026.<sup>a</sup>

|                        | Adding salt in cooking <sup>b</sup> |               |         | Adding salt at the table <sup>b</sup> |               |         |
|------------------------|-------------------------------------|---------------|---------|---------------------------------------|---------------|---------|
|                        | OR                                  | (95%CI)       | P value | OR                                    | (95%CI)       | P value |
| <b>Male</b>            | 0.96                                | (0.78 – 1.20) | 0.735   | 1.38                                  | (1.09 -1.73)  | 0.007   |
| <b>Age (&gt;55y)</b>   | 0.66                                | (0.59 - 0.73) | <0.001  | 0.67                                  | (0.53 – 0.85) | 0.001   |
| <b>Education Level</b> |                                     |               |         |                                       |               |         |
| ≥8 y                   | 0.90                                | (0.72 – 1.13) | 0.363   | 0.99                                  | (0.78 – 1.26) | 0.940   |

OR: Odds Ratio; (95%CI): 95% Confidence Interval

<sup>a</sup> Model included age, sex, level of education and city.

<sup>b</sup> Often /always.

## References

1. Allemandi, L.; Tiscornia, M.V.; Ponce, M.; Castronuovo, L.; Dunford, E.; Schoj, V. Sodium content in processed foods in Argentina: Compliance with the national law. *Cardiovasc Diagn Ther* **2015**, *5*, 197-206.
2. Ferrante, D.; Apro, N.; Ferreira, V.; Virgolini, M.; Aguilar, V.; Sosa, M.; Perel, P.; Casas, J. Feasibility of salt reduction in processed foods in Argentina. *Revista panamericana de salud publica = Pan American journal of public health* **2011**, *29*, 69-75.
3. Allemandi, L.; Garipe, L.; Schoj, V.; Pizarro, M.; Tambussi, A. Análisis del contenido de sodio y grasas trans de los alimentos industrializados en Argentina. [analysis of sodium and trans fat content of industrialized foods in Argentina]. In *Rev Argent Salud Pública*, Buenos Aires, 2013; Vol. 4, pp 14-19.
4. Elorriaga, N.; Bardach, A.E.; Defago, M.D.; Levi, L.; Nessier, M.C.; Irazola, V. Development, implementation and evaluation of tools for decision-making on healthy eating policies in Argentina. In *Anuario Becas de Investigación "Carrillo Oñativia" 2012*, Ministerio de Salud: Buenos Aires, 2016; pp 250-251.
5. Ministerio de Salud de la Nación. S.A.R.A. Sistema de análisis y registro de alimentos. Programa informático para análisis de encuestas alimentarias – sara. <http://msal.gov.ar/htm/Site/ennys/site/sara.asp>
